# Supplementary material
Source: HighWire-hosted journal article supplement (https://jnm.snmjournals.org/highwire/filestream/94842/field_highwire_adjunct_files/0/161711_Supplemental_Data.pdf)
Supplement: 161711_Supplemental_Data.pdf [file 161711_Supplemental_Data.pdf]

## Synthesis of non-radioactive *N*-methyl-aurine conjugated bile acids – Reference materials

### *Chemicals and materials*

Cholic acid (CA), chenodeoxycholic acid (CDCA), deoxycholic acid (DCA), ursodeoxycholic acid (UDCA), lithocholic acid (LCA), *N*-methyl-aurine sodium salt, diethyl phosphoryl cyanide (DEPC), triethylamine (Et<sub>3</sub>N), dimethylformamide (DMF; dry) were obtained from Sigma-Aldrich Ltd. and used as received. Concentrated HCl (diluted to approximately 10% with water), ethanol (EtOH), methanol (MeOH), diethyl ester (Et<sub>2</sub>O) and ethylacetate (EtOAc) were obtained as analytical grade from VWR International Ltd. 1 N aqueous NaOH (sterile) was prepared by the pharmacy at Aarhus University Hospital. Sep-Pak® C18 Plus Short Cartridges (360 mg sorbent per cartridge, 55–105 µm particle size) were obtained from Waters® and preconditioned before use with ethanol (10 mL) followed by water (10 mL).

### *Synthesis*

Analytical amounts of non-radioactive *N*-methyl-aurine conjugated bile acids, used as reference materials in the radiosyntheses of their respective <sup>11</sup>C-derivatives, were prepared by a method similar to one reported for preparation of the corresponding taurine conjugates (1). In brief, to a solution of the unconjugated bile acid in dry DMF (0.25 M) at 0 °C were added successively *N*-methyl-aurine sodium salt (1 eq.), DEPC (1.1 eq.) and Et<sub>3</sub>N (2.9 eq.). The solution was stirred at 0 °C for 45 min, then overnight at room temperature. The reaction mixture was quenched by adding 1 N NaOH until pH >12. The pH was then adjusted to approximately 7 with aqueous 10% HCl. The neutralized mixture was diluted with water (20 mL) and then put on a preconditioned C18-cartridge. The cartridge was successively washed with water (20 mL) and 25% aqueous ethanol (20 mL) and then eluted with 100% ethanol (20 mL). The last fraction was collected and evaporated to dryness under a stream of nitrogen at room temperature. The remaining solid residue was recrystallized from EtOH/EtOAc (MTCA, MTCDCa, MTUDCA), aqueous MeOH/EtOAc (MTDCA) or MeOH/Et<sub>2</sub>O (MTLCA) to

give the final *N*-methyl-aurine conjugated bile acid as its sodium salt. All conjugated bile acids were obtained as white solids and characterized by ESI-MS.

### **Determination of lipophilicity by reverse phase thin layer chromatography (RP-TLC)**

The lipophilicity (= hydrophobicity – polarity) of CSar (MGCA), MTCA, MTCDCa, MTDCA, MTUDCA, MTLCA as well as GCA, TCA and CA was determined by RP-TLC (2): Samples of non-radioactive bile acids in methanol (approximately 2  $\mu$ M) were spotted on pre-coated C18 RP-TLC (5x10x0.15) plates (Alugram<sup>®</sup> RP-18W/UV<sub>254</sub>, Macherey-Nagel) and the solvent was subsequently evaporated gently by heating with warm air (50 °C). The plates were eluted in a closed chamber at room temperature using mixtures of methanol and aqueous ammonium acetate (15 mM) adjusted to pH 7.40 with 25% aqueous ammonia. The plates were eluted with five different concentrations of methanol (50%, 60%, 70%, 80%, and 90%). The eluted spots were visualized with 5% aqueous H<sub>2</sub>SO<sub>4</sub> and heating with hot air (300 °C). The measured retention factor  $R_f$  (i.e. travelled distance of spot over travelled distance of solvent front) was used to calculate  $R_M$  according to equation 1. Over the five concentration levels of methanol,  $\phi$ , the relationship with  $R_M$  was linear ( $r^2 > 0.95$ ) for all compounds investigated. This allowed for determination of  $R_{Mw}$  and  $S$ , where  $R_{Mw}$  reflects the lipophilicity of the compound, i.e. the higher the value of  $R_{Mw}$ , the more lipophilic, and  $S$  the degree of responsiveness to changes in mobile phase composition.

$$R_M = R_{Mw} - S\phi \quad \text{where } R_M = \log(1/R_f - 1) \quad (\text{eq. 1})$$

## Tracer specific details for LC-MS analysis

For all tracers, the chromatographic column used was a Phenomenex® Synergi™ 4 µm MAX-RP 80A (2.0x100 mm) and the flow was 0.9 mL/min. Tracer specific details for LC-MS analysis are given in Supplemental Tables 1 and 2.

**Supplemental Table 1.** Tracer specific details for LC-MS analysis

| Tracer                 | Eluent       |                                      | R.T.                   | R.T.                              | R.T.                            |
|------------------------|--------------|--------------------------------------|------------------------|-----------------------------------|---------------------------------|
|                        | Acetonitrile | Aq. NH <sub>4</sub> OAc <sup>+</sup> | (tracer) <sup>†</sup>  | (N-desmethyl tracer) <sup>†</sup> | (parent bile acid) <sup>†</sup> |
| <sup>11</sup> C-MTCA   | 30 %         | 70 %                                 | 7.5 min<br>(528.3 m/z) | 5.8 min<br>(514.3 m/z)            | 10.9 min<br>(407.3 m/z)         |
| <sup>11</sup> C-MTUDCA | 31 %         | 69 %                                 | 6.2 min<br>(512.3 m/z) | 4.6 min<br>(498.3 m/z)            | 11.3 min<br>(391.3 m/z)         |
| <sup>11</sup> C-MTCDCA | 36 %         | 64 %                                 | 6.8 min<br>(512.3 m/z) | 5.5 min<br>(498.3 m/z)            | 12.1 min<br>(391.3 m/z)         |
| <sup>11</sup> C-MTDCA  | 37 %         | 63 %                                 | 6.8 min<br>(512.3 m/z) | 5.6 min<br>(498.3 m/z)            | 11.0 min<br>(391.3 m/z)         |
| <sup>11</sup> C-MTLCA  | 46 %         | 54 %                                 | 5.8 min<br>(496.3 m/z) | 4.9 min<br>(482.3 m/z)            | 12.7 min<br>(375.3 m/z)         |

\* 1 mM aqueous ammonium acetate adjusted to pH 3.0 with glacial acetic acid,

† Retention times (R.T.) for the tracer, its non-<sup>11</sup>C-methylated conjugate and its parent unconjugated bile acid. Values in parentheses are the target masses. For all tracers, the mass spectrometer is running in negative ionization mode (M-H<sup>+</sup>).

**Supplemental Table 2.** Mass Spectrometer Instrument Settings

| Trap settings                | ESI inlet setting            | Smart Parameter Setting (SPS)                   |
|------------------------------|------------------------------|-------------------------------------------------|
| Ion charge control (ICC): On | Capillary voltage: +4,500 V  | Target mass: (reported in Supplemental Table 1) |
| SmartTarget: 40,000          | Nebulizer pressure: 70.0 psi | Compound stability: 100 %                       |
| Max. accu. Time: 100.00 ms   | Dry gas: 12.0 L/min          | Trap drive level: 60 %                          |

Scan window: 400–600 m/z      Dry temperature: 365 °C

---

## Dosimetry data

For each tracer, the data was obtained from PET/CT biodistribution of the tracers in pigs (36–41 kg) and extrapolated to 74-kg human data as described in the main paper. Data for  $^{11}\text{C}$ -MGCA ( $^{11}\text{C}$ -CSar) is from reference (3).

**Supplemental Table 3.** Absorbed Dose Estimates for  $^{11}\text{C}$ -MTCA,  $^{11}\text{C}$ -MTUDCA,  $^{11}\text{C}$ -MTLCA, and  $^{11}\text{C}$ -MGCA

| Target organ                                                 | $^{11}\text{C}$ -MTCA<br>( $\mu\text{Gy}/\text{MBq}$ ) |            | $^{11}\text{C}$ -MTUDCA<br>( $\mu\text{Gy}/\text{MBq}$ ) |            | $^{11}\text{C}$ -MTLCA<br>( $\mu\text{Gy}/\text{MBq}$ ) |            | $^{11}\text{C}$ -MGCA<br>( $\mu\text{Gy}/\text{MBq}$ ) |
|--------------------------------------------------------------|--------------------------------------------------------|------------|----------------------------------------------------------|------------|---------------------------------------------------------|------------|--------------------------------------------------------|
|                                                              | Pig no. 1                                              | Pig no. 2  | Pig no. 1                                                | Pig no. 2  | Pig no. 1                                               | Pig no. 2  | From (3)                                               |
| Adrenals                                                     | 3.2                                                    | 3.0        | 3.0                                                      | 3.0        | 3.4                                                     | 3.3        | 2.9                                                    |
| Brain                                                        | 1.4                                                    | 1.5        | 1.5                                                      | 1.8        | 1.4                                                     | 1.8        | 1.6                                                    |
| Breasts                                                      | 1.6                                                    | 1.7        | 1.6                                                      | 1.8        | 1.7                                                     | 1.9        | 1.7                                                    |
| Gallbladder wall                                             | 5.4                                                    | 31.1       | 22.0                                                     | 17.3       | 5.1                                                     | 4.5        | 59.4                                                   |
| Lower large intestine wall                                   | 3.5                                                    | 3.7        | 3.9                                                      | 3.8        | 2.9                                                     | 3.0        | 3.9                                                    |
| Small intestine                                              | 34.3                                                   | 36.4       | 41.1                                                     | 32.1       | 19.6                                                    | 15.0       | 39.3                                                   |
| Stomach wall                                                 | 13.0                                                   | 11.8       | 3.5                                                      | 3.4        | 53.2                                                    | 38.0       | 3.9                                                    |
| Upper large intestine wall                                   | 6.2                                                    | 6.6        | 7.0                                                      | 6.1        | 4.8                                                     | 4.3        | 7.1                                                    |
| Heart wall                                                   | 2.5                                                    | 2.4        | 2.3                                                      | 2.5        | 2.8                                                     | 2.9        | 2.3                                                    |
| Kidneys                                                      | 3.1                                                    | 3.1        | 3.1                                                      | 3.1        | 3.1                                                     | 3.1        | 2.3                                                    |
| Liver                                                        | 19.5                                                   | 13.4       | 15.7                                                     | 11.8       | 13.7                                                    | 11.2       | 10.8                                                   |
| Lungs                                                        | 2.1                                                    | 2.1        | 2.1                                                      | 2.3        | 2.2                                                     | 2.4        | 2.1                                                    |
| Muscle                                                       | 2.1                                                    | 2.2        | 2.1                                                      | 2.3        | 2.1                                                     | 2.3        | 2.2                                                    |
| Ovaries                                                      | 4.4                                                    | 4.7        | 5.0                                                      | 4.6        | 3.4                                                     | 3.4        | 5.0                                                    |
| Pancreas                                                     | 3.7                                                    | 3.7        | 3.2                                                      | 3.2        | 5.6                                                     | 4.9        | 3.4                                                    |
| Red marrow                                                   | 2.2                                                    | 2.3        | 2.3                                                      | 2.4        | 2.1                                                     | 2.2        | 2.3                                                    |
| Bone surface                                                 | 2.6                                                    | 2.8        | 2.7                                                      | 3.1        | 2.7                                                     | 3.1        | 2.9                                                    |
| Skin                                                         | 1.5                                                    | 1.6        | 1.5                                                      | 1.8        | 1.5                                                     | 1.8        | 1.6                                                    |
| Spleen                                                       | 2.5                                                    | 2.6        | 2.3                                                      | 2.5        | 3.8                                                     | 3.6        | 2.4                                                    |
| Testes                                                       | 1.6                                                    | 1.7        | 1.7                                                      | 2.0        | 1.6                                                     | 2.0        | 1.8                                                    |
| Thymus                                                       | 1.8                                                    | 1.9        | 1.8                                                      | 2.1        | 1.9                                                     | 2.2        | 1.9                                                    |
| Thyroid                                                      | 1.6                                                    | 1.7        | 1.7                                                      | 2.0        | 1.7                                                     | 2.0        | 1.8                                                    |
| Urinary bladder wall                                         | 2.4                                                    | 2.5        | 2.5                                                      | 2.8        | 2.2                                                     | 2.5        | 2.7                                                    |
| Uterus                                                       | 4.1                                                    | 4.4        | 4.6                                                      | 4.3        | 3.2                                                     | 3.2        | 4.6                                                    |
| Total body                                                   | 2.9                                                    | 2.8        | 2.9                                                      | 2.9        | 2.7                                                     | 2.7        | 2.8                                                    |
| <b>Effective dose (<math>\mu\text{Sv}/\text{MBq}</math>)</b> | <b>5.6</b>                                             | <b>5.3</b> | <b>4.6</b>                                               | <b>4.2</b> | <b>9.2</b>                                              | <b>7.3</b> | <b>4.4</b>                                             |

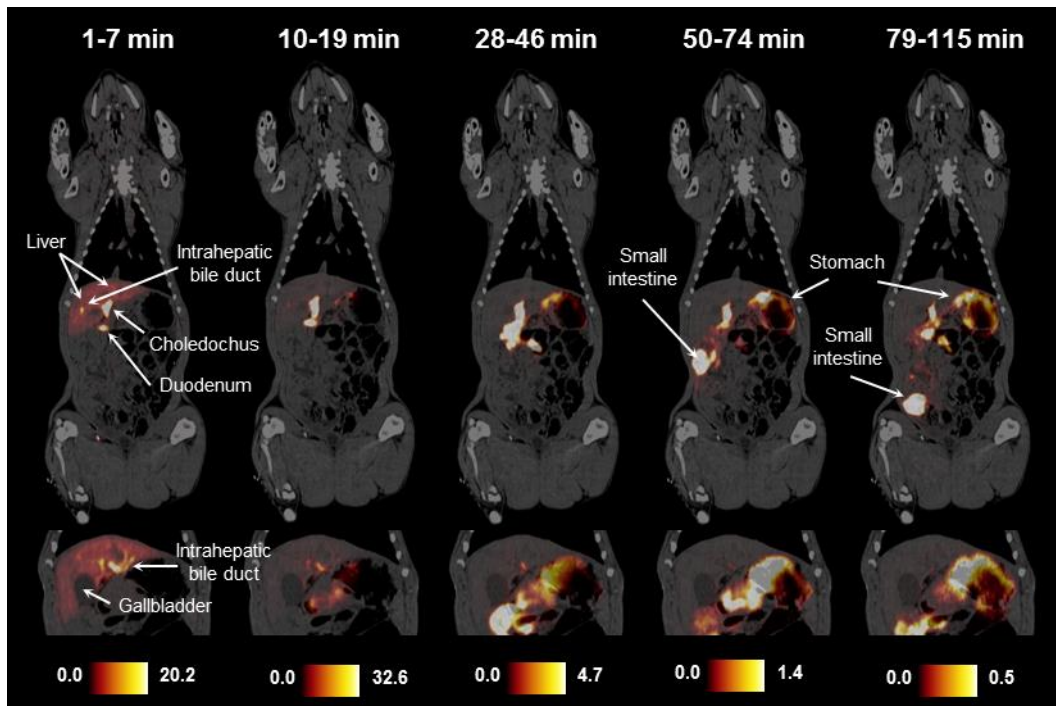

**Supplemental Figure 1.** Whole-body PET/CT images (coronal view) recorded successively after intravenous bolus administration of  $^{11}\text{C}$ -MTCA (511 MBq) in pig no. 1. The insets are for the same respective time intervals, but a different slice to illustrate the content of the gallbladder. The scans were performed with 3, 9, 4 and 5 min between scans and with a progressive increase in scan duration per bed position of 1, 1.5, 3, 4, and 6 min. The color scales are in MBq/ml.

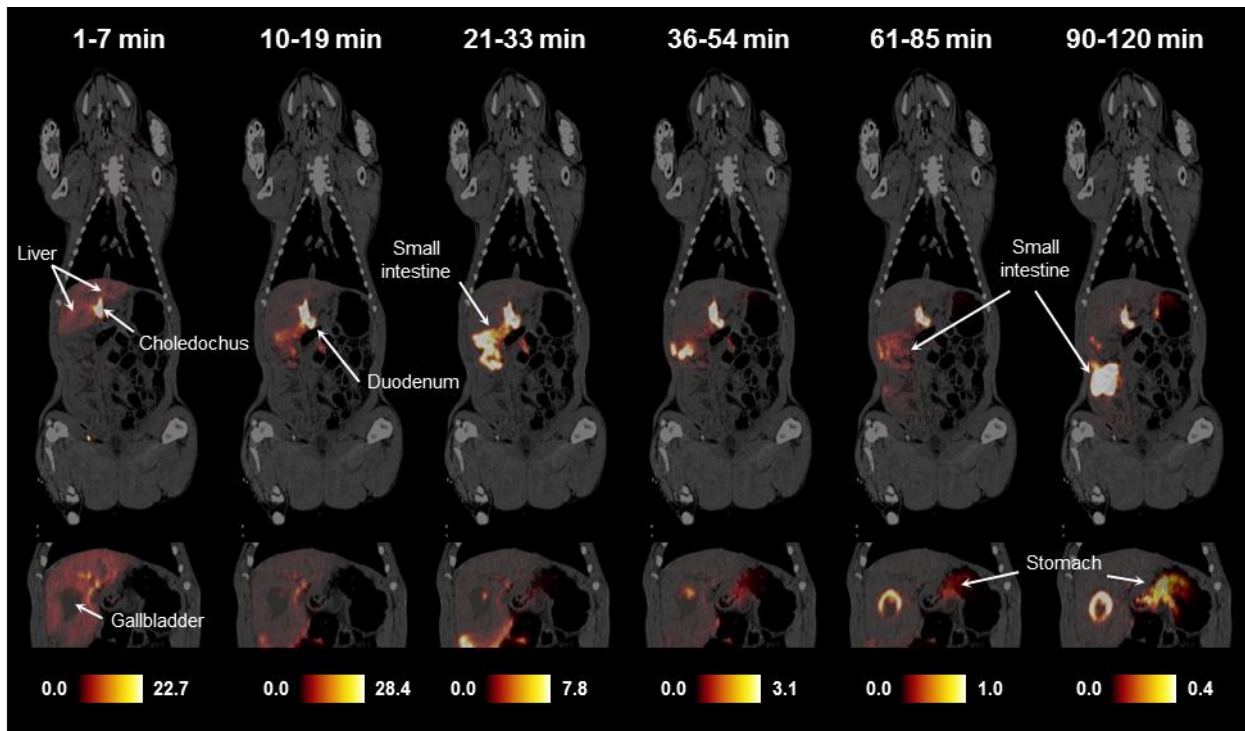

**Supplemental Figure 2.** Whole-body PET/CT images (coronal view) recorded successively after intravenous bolus administration of  $^{11}\text{C}$ -MTUDCA (508 MBq) in pig no. 1. The insets are for the same respective time intervals, but a different slice to illustrate the content of the gallbladder. The scans were performed with 3, 2, 3, 7 and 5 min between scans and with a progressive increase in scan duration per bed position of 1, 1.5, 2, 3, 4, and 5 min. The color scales are in MBq/ml.

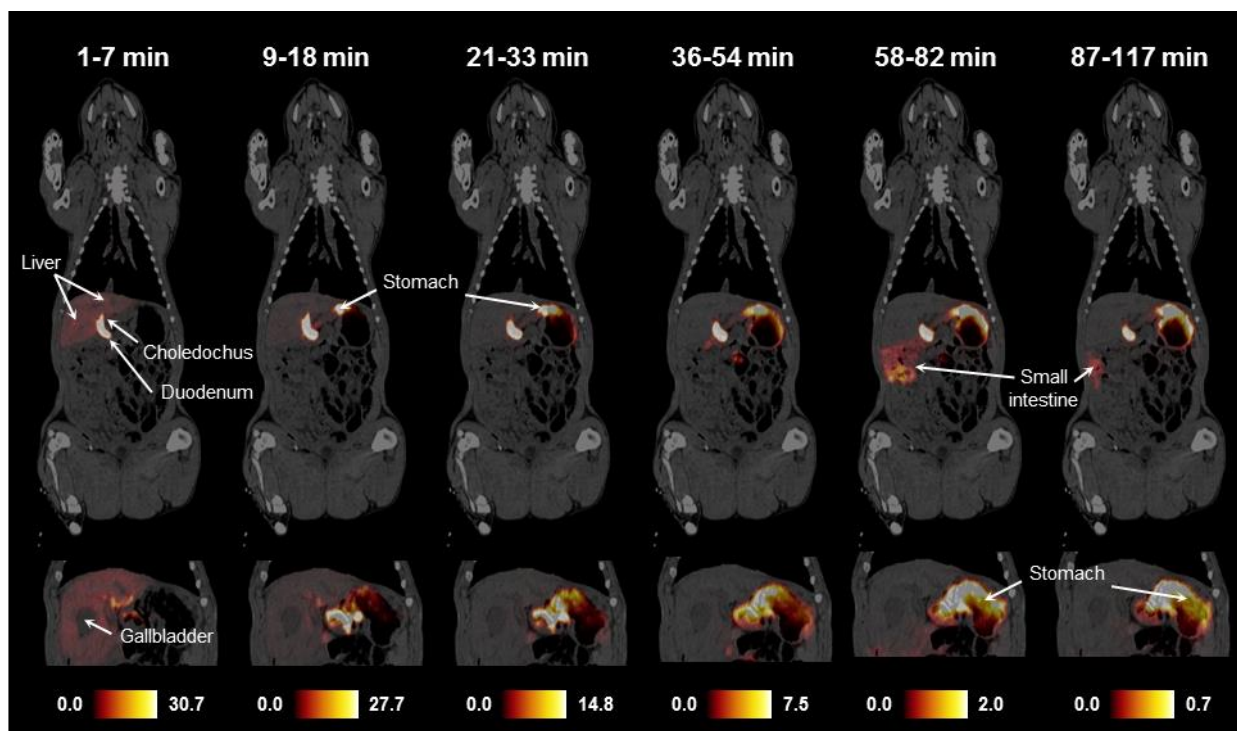

**Supplemental Figure 3.** Whole-body PET/CT images (coronal view) recorded successively after intravenous bolus administration of  $^{11}\text{C}$ -MTLCA (486 MBq) in pig no. 1. The insets are for the same respective time intervals, but a different slice to illustrate the content of the gallbladder. The scans were performed with 2, 3, 3, 4 and 5 min between scans and with a progressive increase in scan duration per bed position of 1, 1.5, 2, 3, 4, and 5 min. The color scales are in MBq/ml.



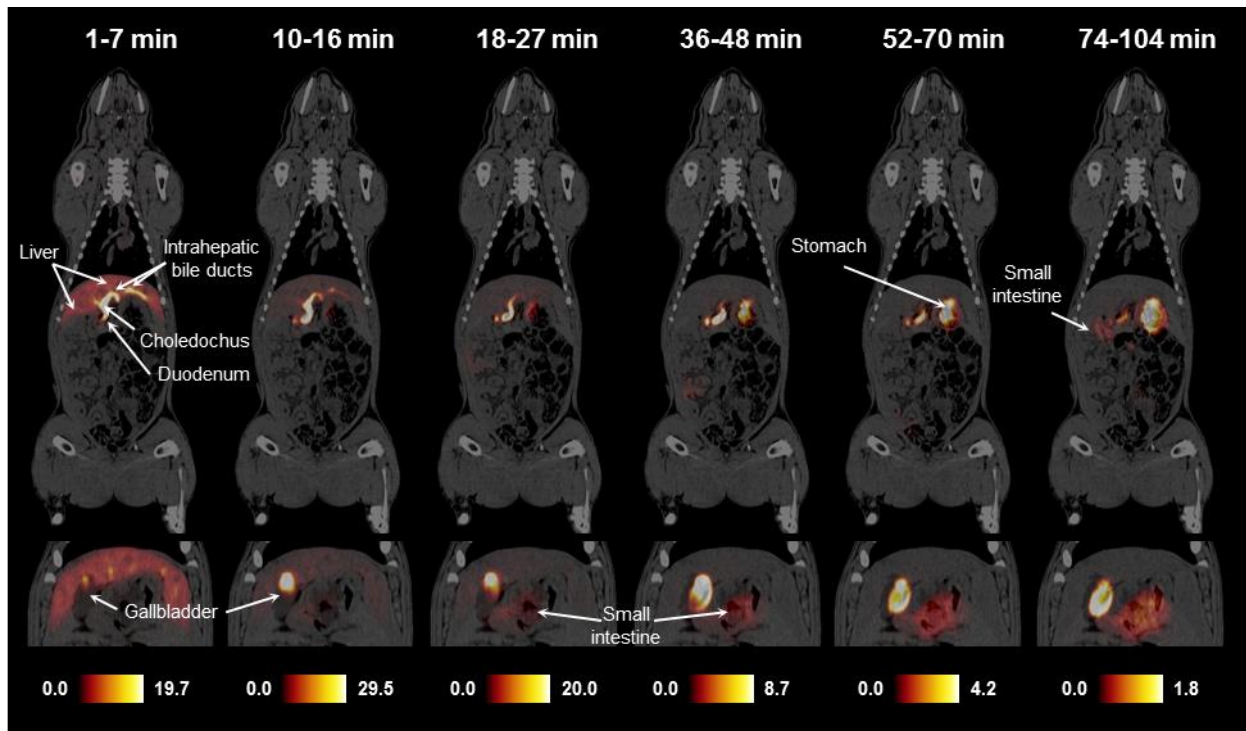

**Supplemental Figure 4.** Whole-body PET/CT images (coronal view) recorded successively after intravenous bolus administration of  $^{11}\text{C}$ -MUDCA (553 MBq) in pig no. 2. The insets are for the same respective time intervals, but a different slice to illustrate the content of the gallbladder. The scans were performed with 3, 2, 9, 5 and 4 min between scans and with a progressive increase in scan duration per bed position of 1, 1, 1.5, 2, 3, and 5 min. The color scales are in MBq/ml.

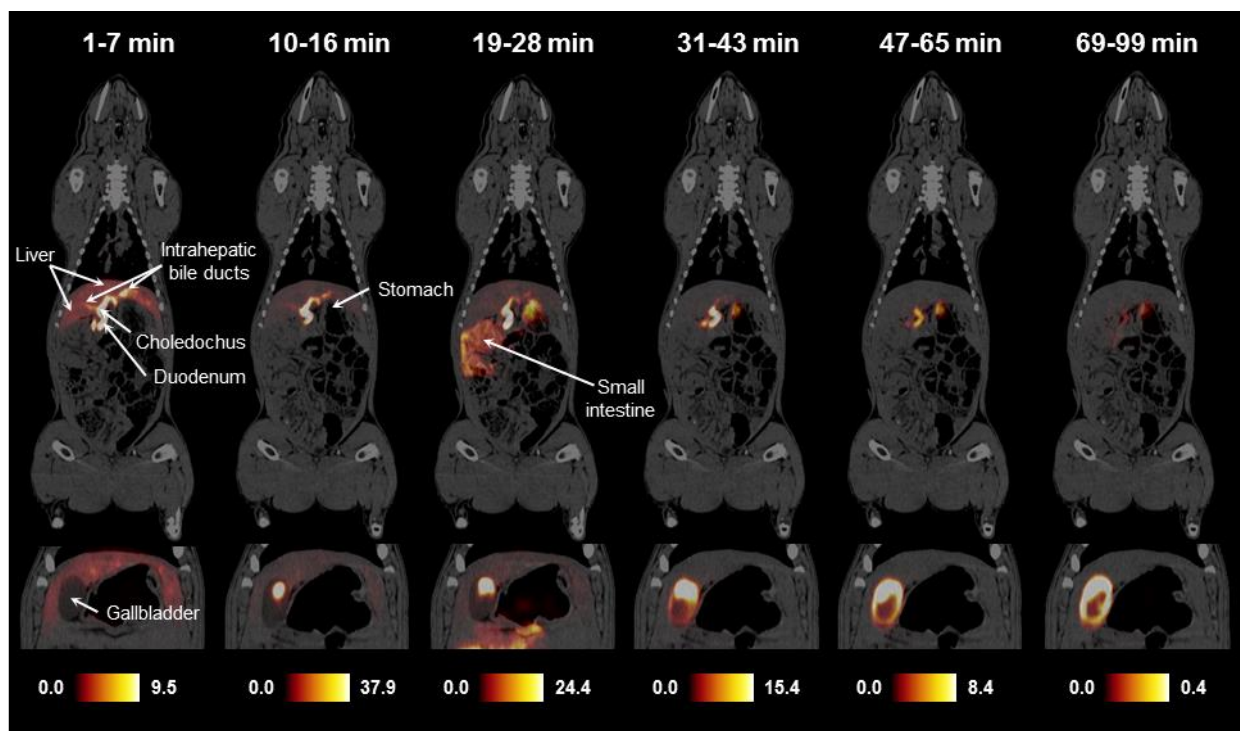

**Supplemental Figure 5.** Whole-body PET/CT images (coronal view) recorded successively after intravenous bolus administration of <sup>11</sup>C-MLCA (536 MBq) in pig no. 2. The insets are for the same respective time intervals, but a different slice to illustrate the content of the gallbladder. The scans were performed with 3, 3, 3, 4 and 4 min between scans and with a progressive increase in scan duration per bed position of 1, 1, 1.5, 2, 3, and 5 min. The color scales are in MBq/ml.

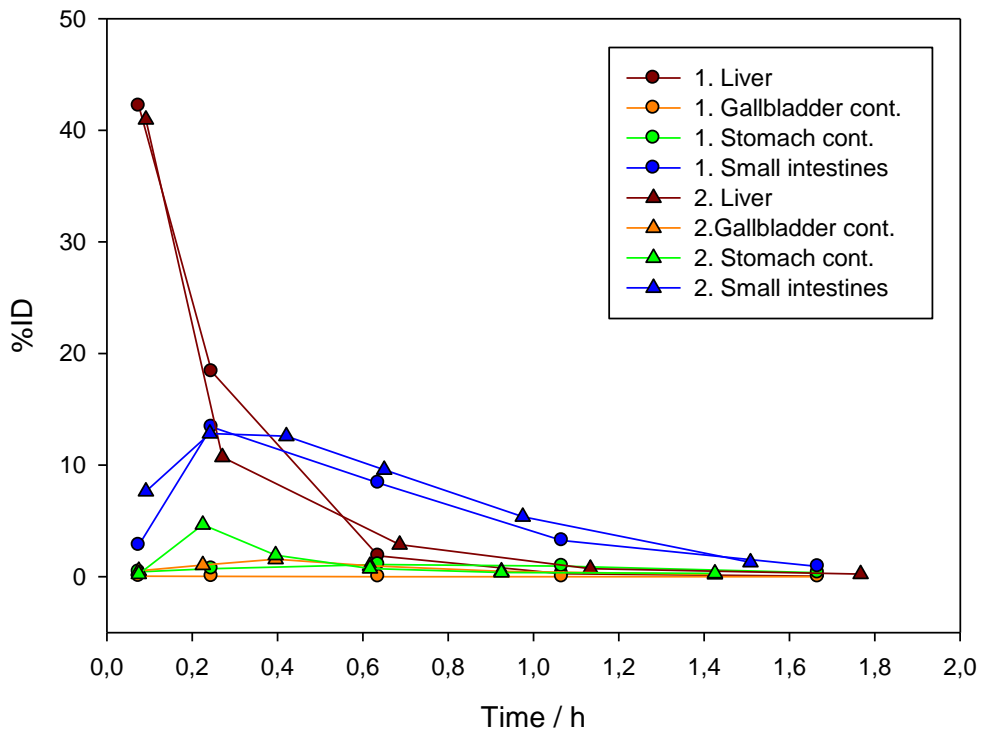

**Supplemental Figure 6.** Time-activity-curve (% of injected dose versus time; not decay-corrected) for  $^{11}\text{C}$ -MTCA. Circles are for pig no. 1, triangles for pig no. 2.

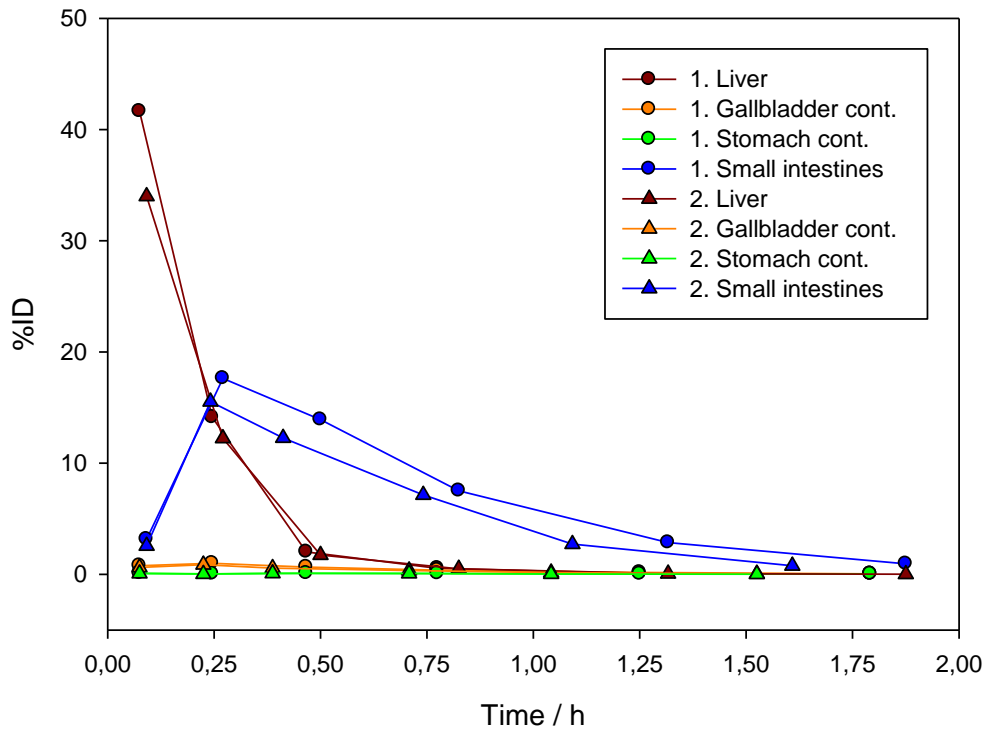

**Supplemental Figure 7.** Time-activity-curve (% of injected dose versus time; not decay-corrected) for  $^{11}\text{C}$ -MTUDCA. Circles are for pig no. 1, triangles for pig no. 2.

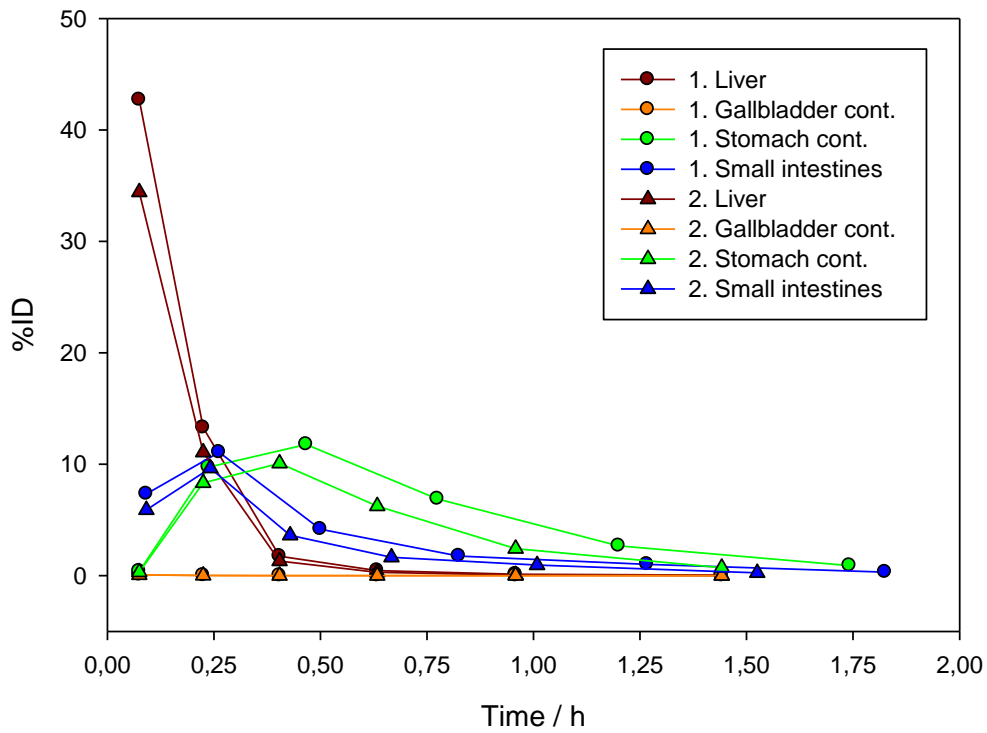

**Supplemental Figure 8.** Time-activity-curve (% of injected dose versus time; not decay-corrected) for  $^{11}\text{C}$ -MTLCA. Circles are for pig no. 1, triangles for pig no. 2.

## References

1. Momose T, Tsubaki T, Iida T, Nambara T. An improved synthesis of taurine- and glycine-conjugated bile acids. *Lipids*. 1997;32:775–778.
2. Sharma R, Majer F, Peta VK, et al. Bile acid toxicity structure–activity relationships: correlations between cell viability and lipophilicity in a panel of new and known bile acids using an oesophageal cell line (HET-1A). *Bioorg Med Chem*. 2010;18:6886–6895.
3. Frisch K, Jakobsen S, Sørensen M, et al. [*N*-Methyl-<sup>11</sup>C]Cholylsarcosine, a novel bile acid tracer for PET/CT of hepatic excretory function: radiosynthesis and proof-of-concept studies in pigs. *J Nucl Med*. 2012;53:772–778.
